# Supplementary material for: Preparation and photo-induced activities of water-soluble amyloid β-C60 complexes
Source: Royal Society of Chemistry journal article supplement (doi:10.1039/c8ra02789g), 2018-01-01
Supplement: c8ra02789g1.pdf [file c8ra02789g1.pdf]

## Electronic Supplementary Information (ESI)

### **Preparation and photo-induced activities of water-soluble amyloid $\beta$ -C<sub>60</sub> complexes**

N. Hasunuma, M. Kawakami, H. Hiramatsu and T. Nakabayashi

#### **Contents**

1. Figures
2. Author Contributions

## 1. Figures

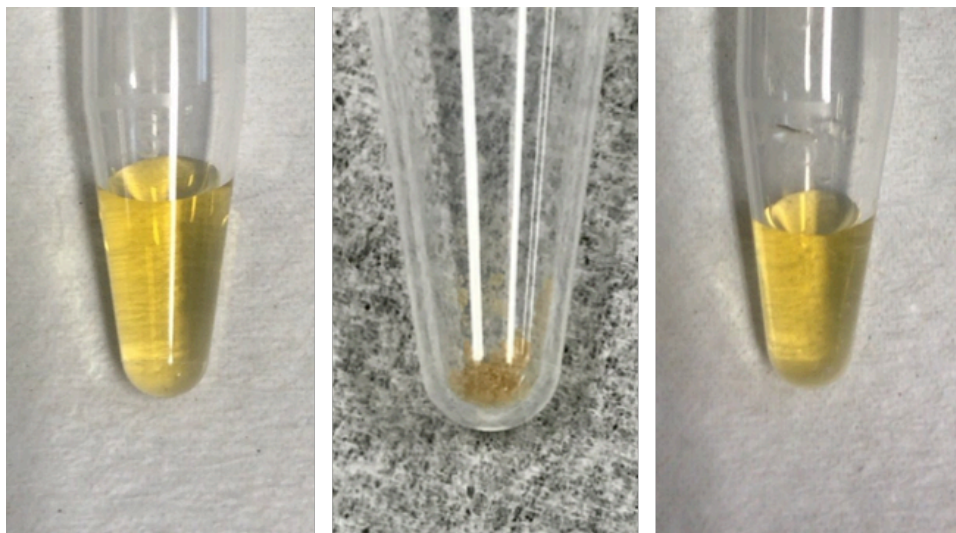

**Fig. S1.** Photograph of A $\beta$ 40-C<sub>60</sub> in aqueous solution (A), as a powder prepared by lyophilization (B), and aqueous solution in which powder (B) was redissolved (C).

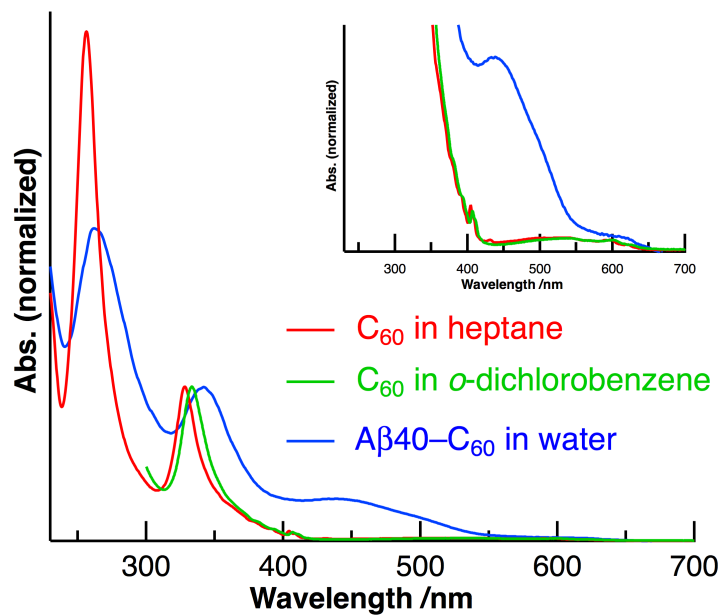

**Fig. S2.** Absorption spectrum of Aβ<sub>40</sub>-C<sub>60</sub> in water (blue), together with absorption spectra of C<sub>60</sub> in heptane (red) and in *o*-dichlorobenzene (green). Since *o*-dichlorobenzene has strong absorption in the UV region, the absorption spectrum of C<sub>60</sub> cannot be observed in *o*-dichlorobenzene in the region less than 300 nm. The peak intensities were normalized to the band at around 340 nm. The expansion to show the absorption in the visible region is shown in inset.

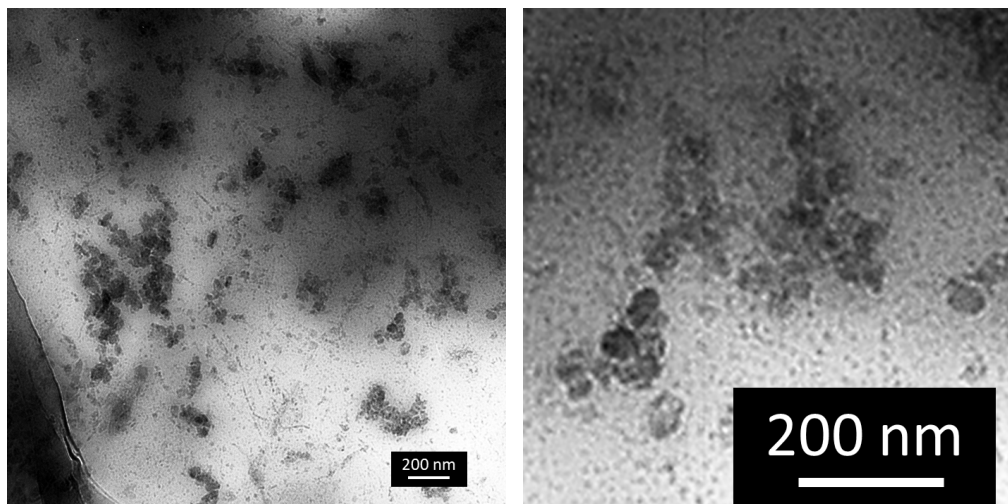

**Fig. S3.** TEM images of Aβ40-C<sub>60</sub>.

(A)

DAEFRHDSGYEVHHQKLVFFAEDVGSNKGAIIGLMVGGVV

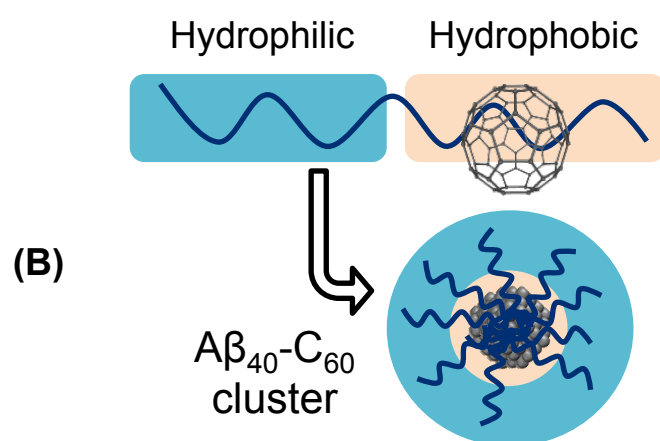

**Fig. S4.** (A) Sequence of A $\beta$ 40 in which hydrophilic residues are underlined and (B) schematic view of A $\beta$ 40-C<sub>60</sub>.

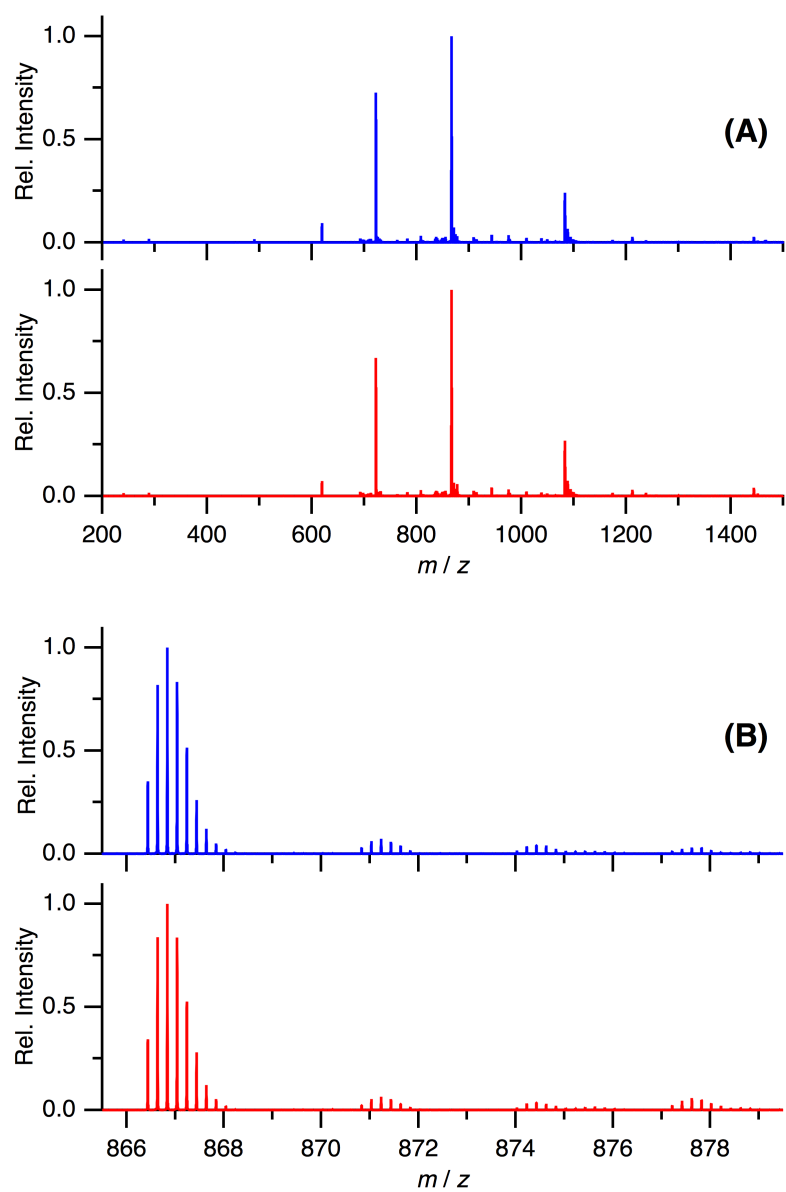

**Fig. S5.** ESI-mass spectra of Aβ40 only without (blue) and with (red) photoirradiation at m/z 200–1500 (A) and 865.5–879.5 (B).

## **2. Author Contributions**

T.N. conceived and conducted the research. N.H. and M.K. carried out the experiments and analyzed the data. H.H. prepared the peptides. T.N., N.H. and H.H. wrote the manuscript.
